# Supplementary material for: Antiviral Activity of Pocapavir in a Randomized, Blinded, Placebo-Controlled Human Oral Poliovirus Vaccine Challenge Model
Source: PubMed Central journal article supplement — J Infect Dis. 2016 Dec 7;215(3):335–43. doi: 10.1093/infdis/jiw542 (PMC5393058; doi:10.1093/infdis/jiw542), 2016-12-07
Supplement: jiw542_suppl_Collett_SUPPLEMENTAL_MATERIAL.pdf [file jiw542_suppl_Collett_SUPPLEMENTAL_MATERIAL.pdf]

COLLETT *et al.* Supplemental Figures S1, S2, S3 and Supplemental Tables S1 and S2

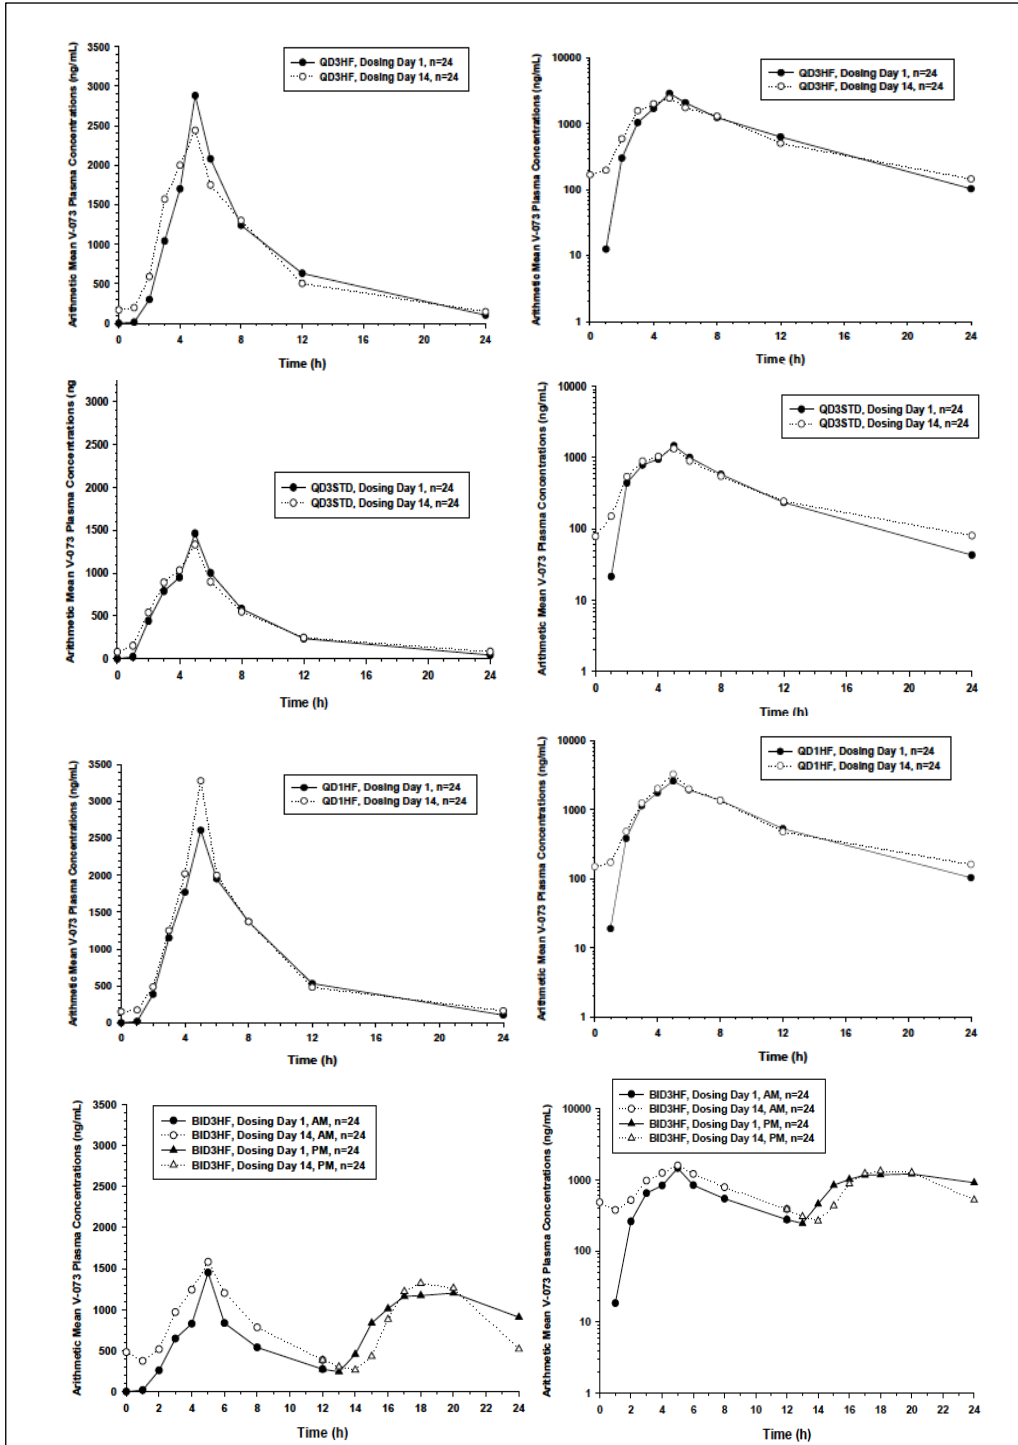

Figure S1: Arithmetic mean of pocapavir plasma concentration-time profiles on dosing day 1 and 14 by cohort on linear and semi-logarithmic scales

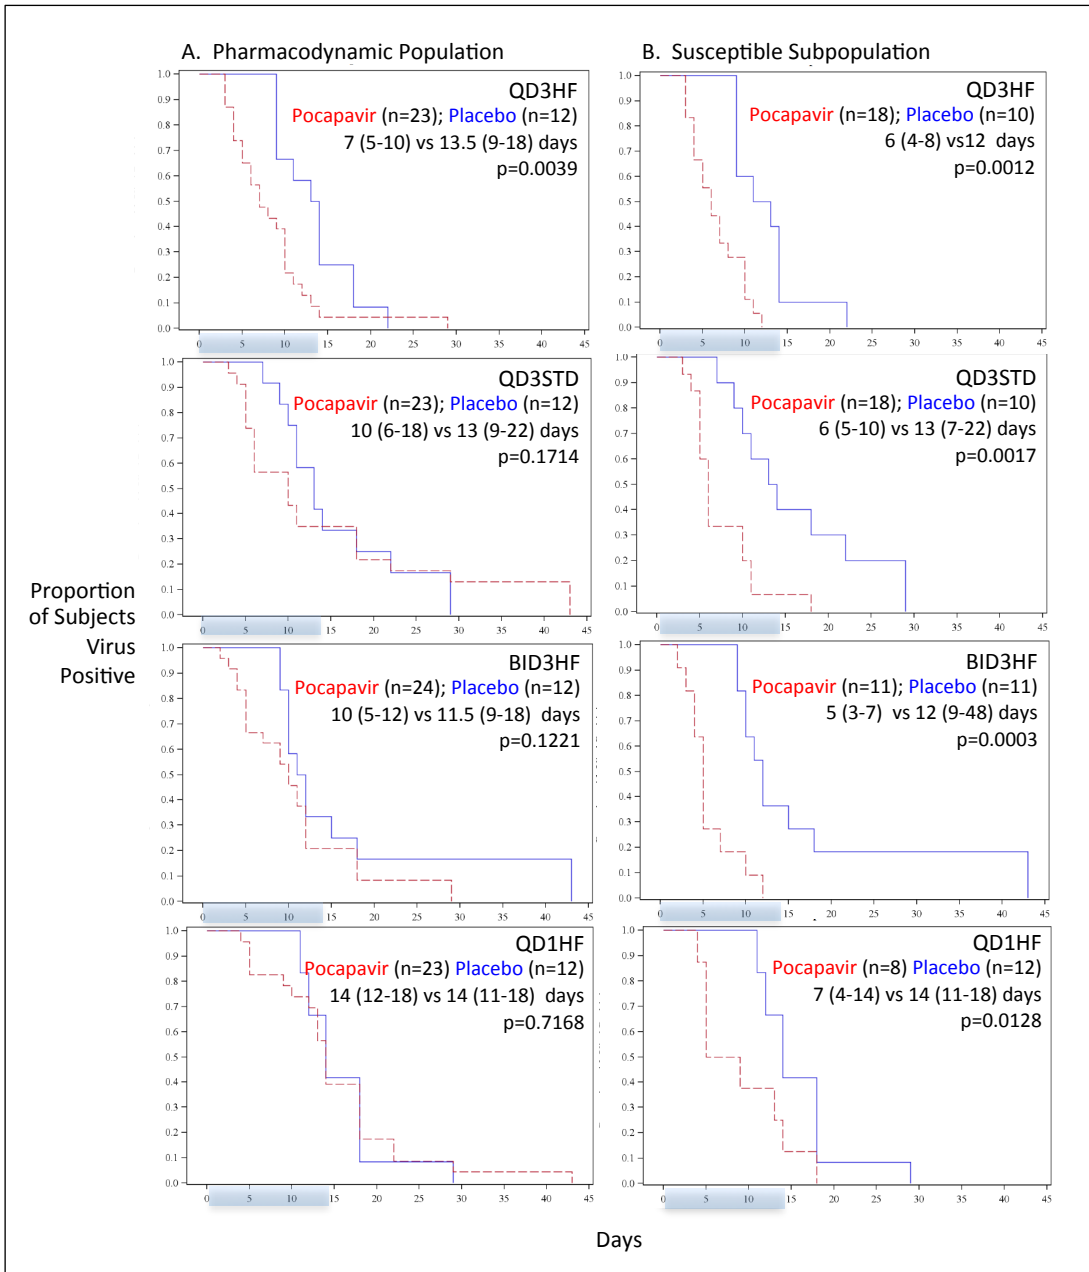

**Figure S2:** Kaplan-Meier plots of time in days from initiation of treatment to virus excretion negativity by cohort for the Pharmacokinetic Population (A) and Susceptible Subpopulation (B). Shaded days, treatment days; (95%CI)

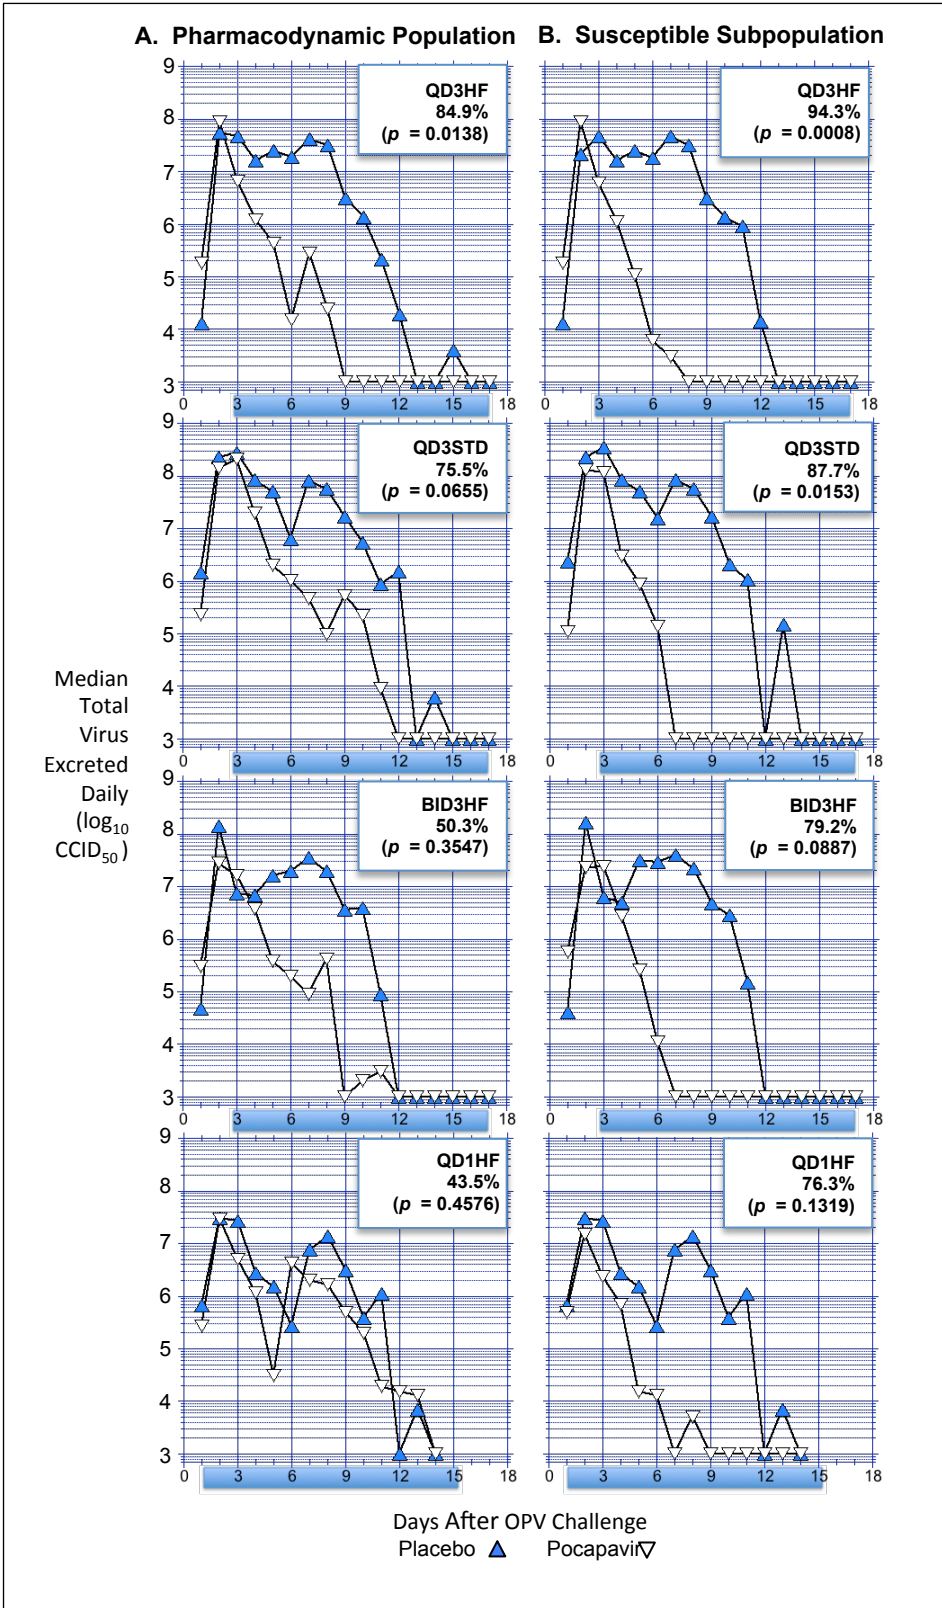

**Figure S3: Median total virus excreted in stool by cohort for the Pharmacokinetic Population (A) and Susceptible Subpopulation (B).** Shaded days, treatment days; % reduction of total excreted virus by actives relative to cohort matched placebos.

| Variable        | QD3HF               |                   | BID3HF              |                   | QD1HF               |                   | QD3STD              |                   | All Combined        |                   | All Combined |               |
|-----------------|---------------------|-------------------|---------------------|-------------------|---------------------|-------------------|---------------------|-------------------|---------------------|-------------------|--------------|---------------|
|                 | Pocapavir<br>(N=24) | Placebo<br>(N=12) | Pocapavir<br>(N=24) | Placebo<br>(N=12) | Pocapavir<br>(N=24) | Placebo<br>(N=12) | Pocapavir<br>(N=24) | Placebo<br>(N=12) | Pocapavir<br>(N=96) | Placebo<br>(N=48) | n            | N (%)         |
| Any AE          | 13<br>(54.2%)       | 19<br>(75.0%)     | 14<br>(58.3%)       | 29<br>(83.3%)     | 17<br>(70.8%)       | 9<br>(75.0%)      | 44<br>(66.7%)       | 16<br>(66.7%)     | 126<br>(62.5%)      | 8<br>(66.7%)      | 60           | 88<br>(75.0%) |
| AE Intensity    |                     |                   |                     |                   |                     |                   |                     |                   |                     |                   |              |               |
| Mild            | 8<br>(33.3%)        | 18<br>(66.7%)     | 12<br>(50.0%)       | 27<br>(75.0%)     | 17<br>(70.8%)       | 13<br>(75.0%)     | 43<br>(62.5%)       | 15<br>(62.5%)     | 118<br>(54.2%)      | 5<br>(41.7%)      | 52           | 81<br>(64.6%) |
| Moderate        | 4<br>(16.7%)        | 1<br>(8.3%)       | 2<br>(8.3%)         | 2<br>(8.3%)       | 0                   | 0                 | 1<br>(4.2%)         | 3<br>(25.0%)      | 7<br>(7.3%)         | 7<br>(10.4%)      | 7            | 5             |
| Severe          | 1<br>(4.2%)         | 0                 | 0                   | 0                 | 0                   | 0                 | 0                   | 0                 | 1<br>(1.0%)         | 0                 | 0            | 0             |
| AE Relationship |                     |                   |                     |                   |                     |                   |                     |                   |                     |                   |              |               |
| Not             | 9<br>(37.5%)        | 14<br>(41.7%)     | 11<br>(45.8%)       | 18<br>(58.3%)     | 14<br>(58.3%)       | 9<br>(75.0%)      | 38<br>(58.3%)       | 14<br>(58.3%)     | 102<br>(50.0%)      | 5<br>(41.7%)      | 48           | 63<br>(54.2%) |
| Unlikely        | 2<br>(8.3%)         | 2<br>(16.7%)      | 3<br>(12.5%)        | 6<br>(16.7%)      | 2<br>(8.3%)         | 0                 | 5<br>(16.7%)        | 1<br>(4.2%)       | 18<br>(8.3%)        | 3<br>(25.0%)      | 8            | 17<br>(14.6%) |
| Possibly        | 2<br>(8.3%)         | 3<br>(16.7%)      | 0                   | 5<br>(8.3%)       | 1<br>(4.2%)         | 0                 | 1<br>(4.2%)         | 1<br>(4.2%)       | 6<br>(4.2%)         | 0                 | 4            | 8<br>(6.3%)   |
| Definitely      | 0                   | 0                 | 0                   | 0                 | 0                   | 0                 | 0                   | 0                 | 0                   | 0                 | 0            | 0             |

Table S1: Summary of Adverse Events by Intensity and Relation to Treatment

| Variable                                       | QD3HF            |                | BID3HF           |                | QD1HF            |                | QD3STD           |                | All Combined     |                |
|------------------------------------------------|------------------|----------------|------------------|----------------|------------------|----------------|------------------|----------------|------------------|----------------|
|                                                | Pocapavir (N=24) | Placebo (N=12) | Pocapavir (N=96) | Placebo (N=48) |
|                                                | n                | N (%)          |
| Any AE                                         | 13               | 54.2%          | 14               | 58.3%          | 17               | 70.8%          | 16               | 66.7%          | 60               | 62.5%          |
|                                                | 28               | 75.0%          | 25               | 83.3%          | 29               | 75.0%          | 44               | 86.7%          | 126              | 88             |
|                                                | 9                |                | 10               |                | 13               |                | 9                |                | 8                |                |
|                                                | 19               |                | 29               |                | 13               |                | 9                |                | 27               |                |
|                                                | 75.0%            |                | 83.3%            |                | 70.8%            |                | 75.0%            |                | 66.7%            |                |
|                                                | 25               |                | 29               |                | 13               |                | 9                |                | 27               |                |
|                                                | 83.3%            |                | 83.3%            |                | 70.8%            |                | 75.0%            |                | 66.7%            |                |
|                                                | 10               |                | 10               |                | 13               |                | 9                |                | 8                |                |
|                                                | 14               |                | 29               |                | 13               |                | 9                |                | 27               |                |
|                                                | 58.3%            |                | 83.3%            |                | 70.8%            |                | 75.0%            |                | 66.7%            |                |
|                                                | 29               |                | 29               |                | 13               |                | 9                |                | 27               |                |
|                                                | 83.3%            |                | 83.3%            |                | 70.8%            |                | 75.0%            |                | 66.7%            |                |
| Organ System                                   |                  |                |                  |                |                  |                |                  |                |                  |                |
| Cardiac disorders                              | 0                | 0              | 0                | 0              | 0                | 0              | 0                | 0              | 0                | 0              |
|                                                | 0                | 0              | 1                | 8.3%           | 0                | 0              | 0                | 0              | 0                | 2              |
|                                                | 0                | 0              | 1                | 8.3%           | 0                | 0              | 0                | 0              | 0                | 2              |
|                                                | 0                | 0              | 0                | 0              | 0                | 0              | 0                | 0              | 0                | 0              |
| Ear, labyrinth disorders                       | 0                | 0              | 0                | 0              | 0                | 0              | 0                | 0              | 0                | 0              |
|                                                | 0                | 0              | 0                | 0              | 0                | 0              | 0                | 0              | 0                | 0              |
|                                                | 0                | 0              | 0                | 0              | 0                | 0              | 0                | 0              | 0                | 0              |
|                                                | 0                | 0              | 0                | 0              | 0                | 0              | 0                | 0              | 0                | 0              |
| Eye disorders                                  | 0                | 0              | 0                | 0              | 1                | 4.2%           | 0                | 0              | 1                | 1.0%           |
|                                                | 0                | 0              | 0                | 0              | 1                | 4.2%           | 0                | 0              | 1                | 1.0%           |
|                                                | 0                | 0              | 0                | 0              | 0                | 0              | 0                | 0              | 0                | 0              |
|                                                | 0                | 0              | 0                | 0              | 0                | 0              | 0                | 0              | 0                | 0              |
| Gastrointestinal disorders                     | 5                | 20.8%          | 4                | 16.7%          | 5                | 20.8%          | 3                | 12.5%          | 17               | 17.7%          |
|                                                | 10               | 41.7%          | 14               | 33.3%          | 5                | 41.7%          | 9                | 25.0%          | 31               | 35.4%          |
|                                                | 6                | 41.7%          | 4                | 33.3%          | 5                | 41.7%          | 9                | 25.0%          | 31               | 35.4%          |
|                                                | 20.8%            |                | 16.7%            |                | 20.8%            |                | 12.5%            |                | 17.7%            |                |
| General disorders, admin site conditions       | 2                | 8.3%           | 0                | 0              | 0                | 0              | 2                | 8.3%           | 4                | 4.2%           |
|                                                | 1                | 8.3%           | 2                | 8.3%           | 0                | 0              | 2                | 8.3%           | 4                | 4.2%           |
|                                                | 1                | 8.3%           | 2                | 8.3%           | 0                | 0              | 2                | 8.3%           | 4                | 4.2%           |
|                                                | 8.3%             |                | 8.3%             |                | 0                | 0              | 8.3%             |                | 4.2%             |                |
| Immune system disorders                        | 0                | 0              | 1                | 4.2%           | 1                | 4.2%           | 0                | 0              | 2                | 2.1%           |
|                                                | 0                | 0              | 1                | 4.2%           | 1                | 4.2%           | 0                | 0              | 2                | 2.1%           |
|                                                | 0                | 0              | 0                | 0              | 1                | 4.2%           | 0                | 0              | 2                | 2.1%           |
|                                                | 0                | 0              | 0                | 0              | 1                | 4.2%           | 0                | 0              | 2                | 2.1%           |
| Infections, infestations                       | 6                | 25.0%          | 8                | 33.3%          | 4                | 16.7%          | 6                | 25.0%          | 24               | 25.0%          |
|                                                | 1                | 8.3%           | 9                | 33.3%          | 6                | 16.7%          | 7                | 25.0%          | 29               | 25.0%          |
|                                                | 1                | 8.3%           | 3                | 25.0%          | 2                | 16.7%          | 4                | 25.0%          | 10               | 18.8%          |
|                                                | 25.0%            |                | 33.3%            |                | 16.7%            |                | 25.0%            |                | 25.0%            |                |
| Injury, poisoning and procedural complications | 1                | 4.2%           | 0                | 0              | 0                | 0              | 0                | 0              | 1                | 1.0%           |
|                                                | 0                | 0              | 0                | 0              | 0                | 0              | 0                | 0              | 0                | 0              |
|                                                | 0                | 0              | 0                | 0              | 2                | 16.7%          | 2                | 16.7%          | 1                | 1.0%           |
|                                                | 4.2%             |                | 0                | 0              | 16.7%            |                | 16.7%            |                | 1.0%             |                |
| Musculoskeletal, connective tissue disorders   | 2                | 8.3%           | 0                | 0              | 0                | 0              | 4                | 12.5%          | 6                | 5.2%           |
|                                                | 3                | 25.0%          | 0                | 0              | 0                | 0              | 4                | 12.5%          | 6                | 5.2%           |
|                                                | 2                | 8.3%           | 0                | 0              | 0                | 0              | 4                | 12.5%          | 6                | 5.2%           |
|                                                | 8.3%             |                | 0                | 0              | 0                | 0              | 12.5%            |                | 5.2%             |                |
| Nervous system disorders                       | 3                | 12.5%          | 5                | 20.8%          | 10               | 41.7%          | 11               | 45.8%          | 29               | 30.2%          |
|                                                | 7                | 33.3%          | 5                | 33.3%          | 14               | 41.7%          | 21               | 45.8%          | 45               | 30.2%          |
|                                                | 3                | 33.3%          | 5                | 33.3%          | 14               | 41.7%          | 21               | 45.8%          | 45               | 30.2%          |
|                                                | 12.5%            |                | 20.8%            |                | 41.7%            |                | 45.8%            |                | 30.2%            |                |
| Renal, urinary disorders                       | 0                | 0              | 1                | 4.2%           | 0                | 0              | 0                | 0              | 1                | 1.0%           |
|                                                | 0                | 0              | 1                | 4.2%           | 0                | 0              | 0                | 0              | 1                | 1.0%           |
|                                                | 0                | 0              | 1                | 4.2%           | 0                | 0              | 0                | 0              | 1                | 1.0%           |
|                                                | 0                | 0              | 1                | 4.2%           | 0                | 0              | 0                | 0              | 1                | 1.0%           |
| Reproductive system, breast disorders          | 1                | 4.2%           | 0                | 0              | 1                | 4.2%           | 0                | 0              | 3                | 3.1%           |
|                                                | 0                | 0              | 1                | 4.2%           | 0                | 0              | 0                | 0              | 3                | 3.1%           |
|                                                | 0                | 0              | 1                | 4.2%           | 0                | 0              | 0                | 0              | 3                | 3.1%           |
|                                                | 4.2%             |                | 4.2%             |                | 0                | 0              | 0                | 0              | 3.1%             |                |
| Respiratory, thoracic, mediastinal disorders   | 1                | 4.2%           | 0                | 0              | 0                | 0              | 1                | 4.2%           | 2                | 2.1%           |
|                                                | 1                | 4.2%           | 0                | 0              | 0                | 0              | 1                | 4.2%           | 2                | 2.1%           |
|                                                | 1                | 4.2%           | 0                | 0              | 0                | 0              | 1                | 4.2%           | 2                | 2.1%           |
|                                                | 4.2%             |                | 0                | 0              | 0                | 0              | 4.2%             |                | 2.1%             |                |
| Skin subcutaneous tissue disorders             | 0                | 0              | 0                | 0              | 0                | 0              | 0                | 0              | 0                | 0              |
|                                                | 0                | 0              | 0                | 0              | 0                | 0              | 0                | 0              | 0                | 0              |
|                                                | 0                | 0              | 3                | 16.7%          | 2                | 16.7%          | 0                | 0              | 0                | 0              |
|                                                | 0                | 0              | 3                | 16.7%          | 2                | 16.7%          | 0                | 0              | 0                | 0              |
|                                                | 0                | 0              | 16.7%            |                | 16.7%            |                | 0                | 0              | 0                | 0              |
| Vascular disorders                             | 1                | 4.2%           | 0                | 0              | 0                | 0              | 0                | 0              | 1                | 1.0%           |
|                                                | 0                | 0              | 0                | 0              | 0                | 0              | 0                | 0              | 1                | 1.0%           |
|                                                | 0                | 0              | 0                | 0              | 0                | 0              | 0                | 0              | 1                | 1.0%           |
|                                                | 4.2%             |                | 0                | 0              | 0                | 0              | 0                | 0              | 1.0%             |                |

Table S2: Summary of Adverse Events by Organ System Involved
